# Supplementary material
Source: publisher figshare collection journal article supplement (https://tandf.figshare.com/articles/dataset/_/13365142)
Supplement: Supplementary file 1 [file 1]

Figure 1 displays three maps showing the spatial distribution of MA-1 isolates across three zones: Zone G, Zone I, and Zone H. The maps are arranged in a 3x3 grid, with Zone G on the left, Zone I in the middle, and Zone H on the right. The maps are color-coded: blue for Zone G, green for Zone I, and red for Zone H. The maps are labeled 'Zone G', 'Zone I', and 'Zone H' at the bottom. A legend at the bottom left shows a yellow circle with a black dot, labeled 'MA-1'.

Figure 1 is a detailed map of the MA-1 site, showing the distribution of  $^{137}\text{Cs}$  and  $^{134}\text{Cs}$ . The map is divided into Zone H (top) and Zone I (bottom) by a green line. Data points are represented by numbers in various colored boxes (blue, green, yellow, orange, red, purple, grey). A legend on the right side of the map lists the numbers 1 through 11, corresponding to different data series. The map includes a scale bar at the bottom left indicating 0, 10, and 20 meters. The title "MA-1" is at the bottom center, with a radiation symbol below it.

Figure 1: MA-1. A large grid of 1000 cells (20 rows by 50 columns) showing the spatial distribution of 1000 simulated particles. The grid is divided into three horizontal zones: Zone G (top, 0-333 rows), Zone I (middle, 333-666 rows), and Zone H (bottom, 666-1000 rows). The particles are represented by numbers 1-9, with some cells containing multiple numbers. The distribution shows a clear pattern of particle movement and interaction across the zones.

The figure is a schematic representation of the MA-1 model, showing a cross-section of a geological site. It is divided into three main horizontal zones: Zone G (top, purple), Zone H (middle, green), and Zone I (bottom, blue). A yellow radioactive symbol labeled 'MA-1' is located in Zone I. The diagram is divided into two main sections by a vertical line. The left section shows a detailed view of the MA-1 source and its immediate surroundings, including various layers and structures. The right section shows a broader view of the site, including the MA-1 source, the surrounding geological layers, and the distribution of different materials (indicated by different colors and patterns). The diagram includes numerous labels for different components, such as 'Zone G', 'Zone H', 'Zone I', 'MA-1', and various numerical values representing different parameters or measurements.

MA-1

Zone I

Zone H

Zone G

Figure 1 displays a 3D visualization of the MA-1 model, showing three distinct zones: Zone G, Zone I, and Zone H. The visualization is composed of a grid of colored cells (blue, green, yellow, red) and numerical values. The MA-1 model is indicated by a yellow circle with a black crosshair.

**Zone G:** The top section of the visualization, featuring a grid of colored cells and numerical values. The MA-1 model is located in the upper right corner of this zone.

**Zone I:** The middle section of the visualization, featuring a grid of colored cells and numerical values. The MA-1 model is located in the lower right corner of this zone.

**Zone H:** The bottom section of the visualization, featuring a grid of colored cells and numerical values. The MA-1 model is located in the lower right corner of this zone.

The map displays the Fukushima Daiichi nuclear power plant site, showing the locations of the three damaged reactors (1, 2, and 3) and the surrounding areas. The map includes a legend for 'Zone H' (Highly Contaminated Area) and 'Zone I' (Intermediate Contaminated Area), and a scale bar indicating distances up to 1.1 km. The map also shows the locations of the three damaged reactors (1, 2, and 3) and the surrounding areas.

Figure 1: Map of the Fukushima Daiichi nuclear power plant site showing the locations of the three damaged reactors (1, 2, and 3) and the surrounding areas. The map is divided into three zones: Zone H (Hazardous), Zone I (Intermediate), and Zone G (General). The map includes a grid system with letters A through Z and numbers 1 through 31. The Fukushima Daiichi Nuclear Power Plant is located in the center of the map, with the damaged reactors 1, 2, and 3 marked. The map also shows the surrounding areas, including the city of Fukushima and the Pacific Ocean. A legend indicates that the shaded areas represent the locations of the damaged reactors, and the unshaded areas represent the surrounding land. The map is titled 'Figure 1' and includes a scale bar indicating distances in kilometers.

Figure 1: Schematic representation of the MA-1 cell line. The diagram shows a horizontal bar representing the cell line, divided into three regions: Zone I (left, purple), Zone H (middle, blue), and Zone G (right, green). A vertical line labeled 'MA-1' with a radiation symbol is positioned between Zone I and Zone H. The bar is marked with various numbers and symbols indicating specific features or data points. The numbers are arranged in a grid-like pattern, with some numbers appearing in multiple rows and columns. The symbols include 'x' and '1'.

Figure 1 displays a 3D visualization of the MA-1 dataset. The plot shows three distinct regions: Zone G (purple), Zone I (green), and Zone H (blue). The data points are represented by small colored spheres. The axes are labeled with numerical values, and the regions are separated by vertical planes. The MA-1 label is accompanied by a radiation symbol.

Figure 1 is a detailed map of the Fukushima Daiichi nuclear power plant site, showing the locations of the three damaged reactors (1, 2, and 3) and the surrounding areas. The map is divided into three zones: Zone I (the innermost area, shaded light blue), Zone H (the middle area, shaded light green), and Zone G (the outermost area, shaded light purple). The map includes a grid system with letters A through T along the top and numbers 1 through 20 along the right side. A scale bar at the bottom indicates distances in meters (0 to 1000m). A legend at the bottom right identifies the symbols for the reactors and the zones.

Figure 1 is a detailed map of the Fukushima Daiichi nuclear power plant site, showing the locations of the three damaged reactors (1, 2, and 3) and the surrounding areas. The map is divided into three zones: Zone I (the innermost area, shaded in light blue), Zone H (the middle area, shaded in light green), and Zone G (the outermost area, shaded in light purple). The map includes a grid of latitude and longitude coordinates, with the latitude ranging from 35° 40' N to 35° 55' N and the longitude from 140° 10' E to 140° 25' E. The map also shows the locations of the three damaged reactors (1, 2, and 3) and the surrounding areas. The map is labeled with "MA-1" and a radiation symbol.

Figure 1 is a detailed map of the MA-1 site, showing the distribution of  $^{137}\text{Cs}$  and  $^{134}\text{Cs}$ . The map is divided into three zones: Zone I (bottom), Zone H (middle), and Zone G (top). A color scale on the right indicates activity levels in Bq/m², ranging from 0 to 1000. The map shows various buildings, roads, and vegetation. A legend at the bottom right identifies symbols for buildings, roads, and vegetation. A scale bar at the bottom left indicates distances in meters (0 to 100).

[illegible]

Figure 1: Map of the study area showing the location of the MA-1 site and the distribution of Zone G and Zone H. The map displays a grid of cells with various symbols (X, 1, 2, 3, 4, 5, 6, 7, 8, 9, 10, 11, 12, 13, 14, 15, 16, 17, 18, 19, 20, 21, 22, 23, 24, 25, 26, 27, 28, 29, 30, 31, 32, 33, 34, 35, 36, 37, 38, 39, 40, 41, 42, 43, 44, 45, 46, 47, 48, 49, 50, 51, 52, 53, 54, 55, 56, 57, 58, 59, 60, 61, 62, 63, 64, 65, 66, 67, 68, 69, 70, 71, 72, 73, 74, 75, 76, 77, 78, 79, 80, 81, 82, 83, 84, 85, 86, 87, 88, 89, 90, 91, 92, 93, 94, 95, 96, 97, 98, 99, 100) and a color-coded legend. Zone G is represented by a light blue background, and Zone H is represented by a light yellow background. The MA-1 site is marked with a black dot and labeled 'MA-1'.

Figure 1 is a map of the study area, showing the location of the MA-1 site and the Zone I and Zone H areas. The map displays a grid of cells with various numerical values and symbols. A vertical line separates the 'Zone I' area (left) from the 'Zone H' area (right). The 'MA-1' site is marked with a yellow radiation symbol and the text 'MA-1' near the bottom left. The 'Zone I' area is labeled 'Zone I' at the bottom left. The 'Zone H' area is labeled 'Zone H' at the bottom right. The map includes a scale bar at the bottom left indicating distances of 0, 10, 20, and 30 km. The map also shows a network of roads and a river system.

Figure 1 is a schematic diagram of the MA-1 reactor core, showing the distribution of  $^{235}\text{U}$  and  $^{238}\text{U}$ . The core is divided into two main regions: Zone H (top) and Zone I (bottom), separated by a horizontal line. The diagram illustrates the spatial distribution of these isotopes within the core. Zone H contains a central fuel element (17) and several surrounding fuel elements (1, 2, 3, 4, 5, 6, 7, 8, 9, 10, 11, 12, 13, 14, 15, 16). Zone I contains a central fuel element (17) and several surrounding fuel elements (1, 2, 3, 4, 5, 6, 7, 8, 9, 10, 11, 12, 13, 14, 15, 16). The diagram shows the spatial distribution of  $^{235}\text{U}$  (represented by black dots) and  $^{238}\text{U}$  (represented by white dots) within the core. The MA-1 label is located at the bottom left, with a radiation symbol next to it.

Figure 1 is a schematic diagram of the MA-1 reactor core. The diagram shows a cross-section of the core with various components labeled. The core is divided into two main regions: Zone H (top) and Zone I (bottom). Zone H contains a central fuel element (1) surrounded by a reflector (2). Zone I contains a central fuel element (1) surrounded by a reflector (2). The diagram also shows the MA-1 reactor logo and the text 'Zone H' and 'Zone I'.

The diagram illustrates the MA-1 model of a cell. It shows a cross-section with various organelles and their associated proteins. The cell is divided into Zone I (cytoplasm) and Zone H (mitochondrial membrane). Key components include the nucleus, rough ER, Golgi apparatus, lysosomes, and mitochondria. Proteins are indicated by 'x' marks and labeled with numbers 1 through 17. A legend at the bottom identifies the symbols: a yellow circle for MA-1, a black circle for Zone I, and a blue circle for Zone H.

Zone H

Zone I

MA-1

[illegible]

Zone H

Zone I

MA-1

Zone H

Zone I

MA-1

10 cm

Diagram illustrating a 10x10 grid divided into two zones:

- Zone H (Top):** Contains various numbers and 'x' marks. The numbers are: 1 (row 1, col 8), 1 (row 1, col 9), 1 (row 2, col 8), 1 (row 2, col 9), 2 (row 2, col 10), 5 (row 3, col 8), 1 (row 3, col 9), 1 (row 3, col 10), 1 (row 4, col 8), 1 (row 4, col 9), 1 (row 4, col 10), 1 (row 5, col 8), 1 (row 5, col 9), 1 (row 5, col 10).
- Zone I (Bottom):** Empty.

A yellow radiation symbol is located on the left side of the grid, and the text "MA-1" is written above it.

MA-1

Zone H

Zone I

Zone G

[illegible]

Zone H

Zone I

Zone G

| G | I | H |  |
|---|---|---|--|
|---|---|---|--|
