# Supplementary material
Source: publisher figshare collection journal article supplement (https://tandf.figshare.com/articles/dataset/_/13365142)
Supplement: Supplementary file 4 [file 1]

## S2

| PTERIDOPHYTA |                                                |             |
|--------------|------------------------------------------------|-------------|
| 17GFA030     | Ovoidites elongatus                            | 3           |
| 17GFA029     | Baculatisporites primarius                     | 3 8         |
| 17GFA028     | Laevigatosporites haardtii                     | 2 4 48      |
| 17GFA027     | Unidentified inaperturate spore 3              | 23 14       |
| 17GFA026     | Leiotriletes paramaximus                       | 1 3         |
| 17GFA025     | Unidentified inaperturate spore 2              | 7 5         |
| 17GFA024     | Laevigatosporites pseudodiscordatus            | 1 7         |
| 17GFA023     | Unidentified inaperturate spore 1              | 5 4 12      |
| 17GFA022     | Stereigranisoris regius                        | 1 5 8       |
| 17GFA021     | Unidentified inaperturate spore 5              | 2 19 2      |
| 17GFA020     | Biretisporites potonei                         | 118         |
| 17GFA019     | Monoleiotriletes angustoides                   | 19 11       |
| 17GFA018     | Cyathidites cf. C. diaphana                    | 32 12       |
| 17GFA017     | Stereisporites antiquasporites                 | 33 5 7      |
| 17GFA016     | Cyathidites minor                              | 20          |
| 17GFA015b    | Cingutritiles clavus                           | 135 2 1 2 1 |
|              | Rettritiles austroclavatidites                 | 4           |
|              | Hazaria sheoparii                              | 134         |
| GYMNOSPERMS  |                                                |             |
|              | Pinuspollenites sp.                            | 3           |
|              | Cathayapollenites sp.                          | 1 2 252     |
|              | Cupressacites hiatipites                       | 1 2 222     |
|              | Cycadopites sp. 2                              | 2 1 220     |
|              | Sequoiapollenites paleocenicus                 | 2 3 86      |
|              | Cycadopites scabratus                          | 6 2 207 3   |
|              | Piceapollenites sp.                            | 2 2 245     |
|              | Cycadopites sp. 1                              | 6 2 215     |
|              | Podocarpidites sp.                             | 2 2 245     |
|              | Abiespollenites sp.                            | 2 2 245     |
| ANGIOSPERMS  |                                                |             |
|              | Tricolporites sp. 3                            | 3 1 263     |
|              | Tricolporites sp. 1                            | 1 2 252     |
|              | Caprifoliolites cf. C. paleocenicus            | 1 2 222     |
|              | Fraxinopollenites variabilis                   | 2 1 220     |
|              | Tricolpites ringens                            | 2 3 86      |
|              | Tricolpites anguloluminosus                    | 6 2 207 3   |
|              | Tripoporipollenites triplicatus                | 2 2 245     |
|              | Alnipollenites quadrapollenites                | 2 2 245     |
|              | Pistillipollenites mcgregorii                  | 2 2 245     |
|              | Sparganiaceapollenites reticulus               | 2 2 245     |
|              | Tricolpites hians                              | 2 2 245     |
|              | Ericipites sp.                                 | 2 2 245     |
|              | Liquidambarpollenites cf. L. mangelsdorffianus | 2 2 245     |
|              | Liliacidites complexus                         | 2 2 245     |
|              | Tricolpites sagax                              | 2 2 245     |
|              | Pterocaryapollenites stellatus                 | 2 2 245     |
|              | Mormipites wyomingensis                        | 2 2 245     |
|              | Caryapollenites imparalis                      | 2 2 245     |
|              | Alnipollenites verus                           | 2 2 245     |
|              | Tilia vespipites                               | 2 2 245     |
|              | Castaneapollenites sp.                         | 2 2 245     |
|              | Tricolpites cf. T. parvistriatus               | 2 2 245     |
|              | Kurtzipites cf. K. trispissatus                | 2 2 245     |
|              | Tripoporipollenites mullensis                  | 2 2 245     |
|              | Ulmipollenites tricostatus                     | 2 2 245     |
|              | cf. Penetetrapites inconspicuus                | 2 2 245     |
|              | Alnipollenites trina                           | 2 2 245     |
|              | Tilia crassipites                              | 2 2 245     |
|              | Echitricolpites supraechinatus                 | 2 2 245     |
|              | Ulmipollenites krempii                         | 2 2 245     |
|              | Siltaria hanleyi                               | 2 2 245     |
|              | Paraalnipollenites alterniporus                | 2 2 245     |
|              | Aquilapollenites tumanganicus                  | 2 2 245     |
|              | Tricolpites reticulatus                        | 2 2 245     |
|              | Graminidites sp.                               | 2 2 245     |
|              | Intratripoporipollenites cf. I. instructus     | 2 2 245     |
|              | Tricolporites sp. 2                            | 2 2 245     |
|              | Caryapollenites inelegans                      | 2 2 245     |
|              | Rettritricolpites crassus                      | 2 2 245     |
|              | Aesculidites sp.                               | 2 2 245     |
|              | Tricolpites sp. 2                              | 2 2 245     |
|              | Tripoporipollenites sp. 2                      | 2 2 245     |
|              | Caryapollenites cf. C. prodromus               | 2 2 245     |
|              | Platycaryapollenites swasticoideus             | 2 2 245     |
|              | Alnipollenites sp. 2                           | 2 2 245     |
|              | Erdtmanipollis procumbentiformis               | 2 2 245     |
|              | Tripoporipollenites sp. 3                      | 2 2 245     |

Zone H

Zone I

MA-3

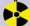

Zone G
