# Supplementary material
Source: publisher figshare collection journal article supplement (https://tandf.figshare.com/articles/dataset/_/13365142)
Supplement: Supplementary file 5 [file 1]

[illegible]

Baculatisporites primarius  
Unidentified inaperturate spore 2  
Laevigatosporites pseudodiscordatus  
Laevigatosporites haardtii  
Retitrites austroclavatidites  
Cyathidites minor  
Ovoidites elongatus  
Leiotrites paramaximus  
Stereigraniporis regius  
Stereosporites antiquasporites  
Monoleiotrites angustoides  
Gleicheniidites senonicus  
Cyathidites cf. C. diaphana  
Unidentified inaperturate spore 1  
Cingulitites clavus  
Unidentified inaperturate spore 3  
Hazaria sheoparii  
Unidentified inaperturate spore 5  
Gleicheniidites cf. G. apilobatus

Sequoiapollenites paleocenicus  
 Pinuspollenites sp.  
 Cathayapollenites sp.  
 Podocarpidites sp.  
 Cupressacites hiatipites  
 Abiespollenites sp.  
 Piceapollenites sp.  
 Cycadopites scabratus  
 cf. Sciadopitys sp.  
 Cycadopites sp. 1

*Tricolpites hians*  
*Caryapollenites imparalis*  
*Momipites wyomingensis*  
 cf. *Penetetrapites inconspicuus*  
*Tricolpites reticulatus*  
*Triporopollenites mullensis*  
*Tricolpites* sp. 1  
*Liliacidites complexus*  
*Pistillipollenites mcgregorii*  
*Tricolporites* sp. 1  
*Sparganiaceapollenites reticulus*  
*Kurtzipites* cf. *K. trispissatus*  
*Echitricolpites supraechinatus*  
*Ulmipollenites tricostatus*  
*Ericipites* sp.  
*Pterocaryapollenites stellatus*  
*Paraalnipollenites alterniporus*  
*Triporopollenites triplicatus*  
*Erdtmanipollis procumbentiformis*  
*Fraxinoipollenites variabilis*  
*Tricolpites sagax*  
*Liquidambarpollenites* cf. *L. mangelsdorffianus*  
*Caryapollenites inelegans*  
*Alnipollenites verus*  
*Alnipollenites* sp. 2  
*Ulmipollenites krempii*  
*Pterocaryapollenites* sp. 1  
*Tricolpites ringens*  
*Aesculidites* sp.  
*Siltaria hanleyi*  
*Caryapollenites* cf. *C. prodromus*  
*Retitricolpites crassus*  
*Tricolpites* cf. *T. parvistriatus*  
*Platycaryapollenites swasticoidus*  
*Graminidites* sp.

## Zone B

## Zone A
