# Supplementary material
Source: publisher figshare collection journal article supplement (https://tandf.figshare.com/articles/dataset/_/13365142)

# Angiosperms

## Gymnosperms

## Pteridophytes

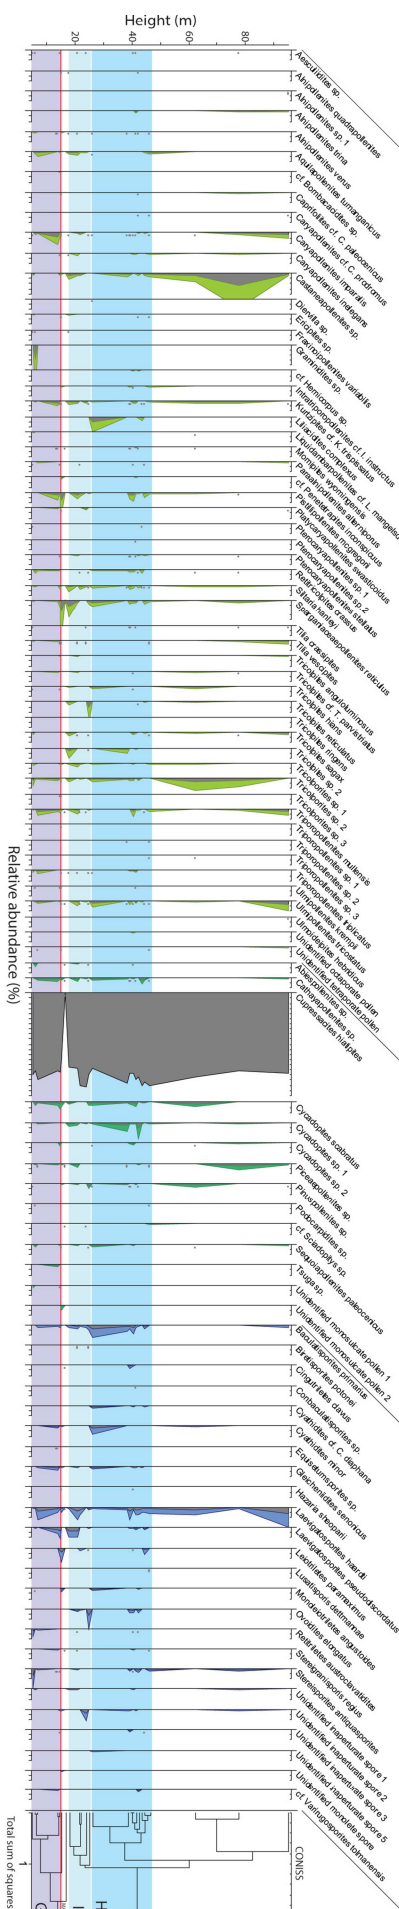

Supplement: Supplementary file 2 [file 1]

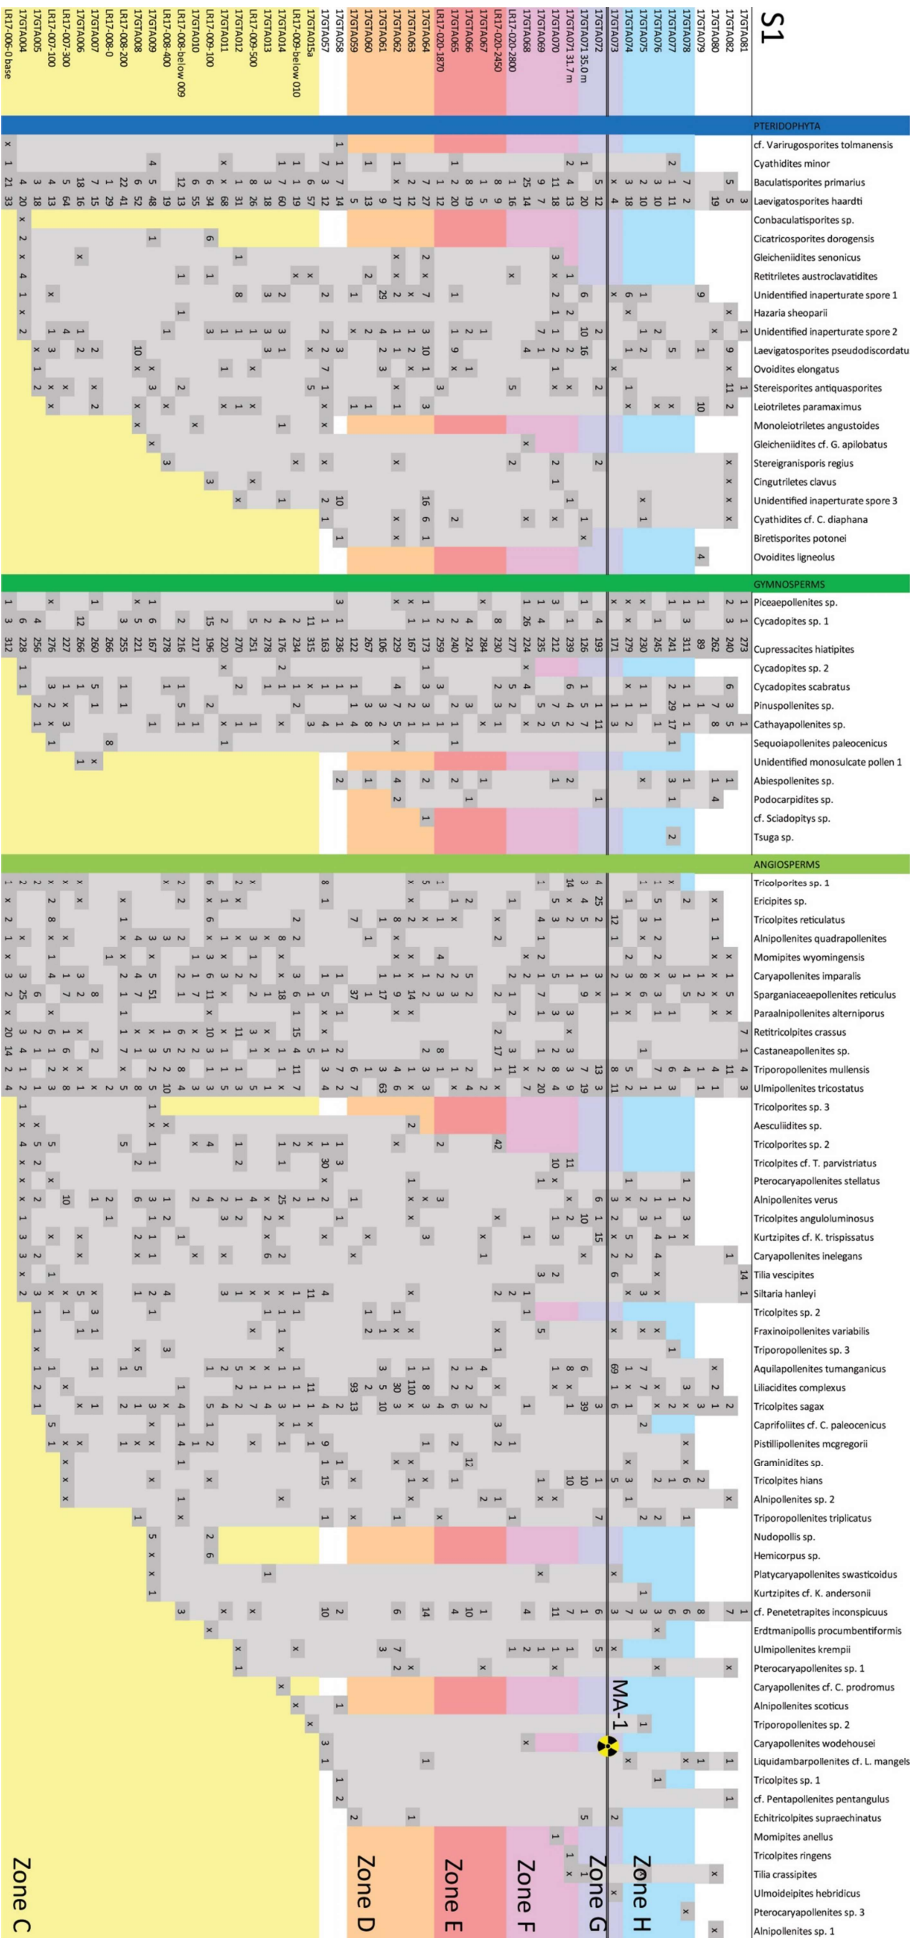

Supplement: Supplementary file 3 [file 1]

# S5

## Angiosperms

## Gymnosperms

## Pteridophytes

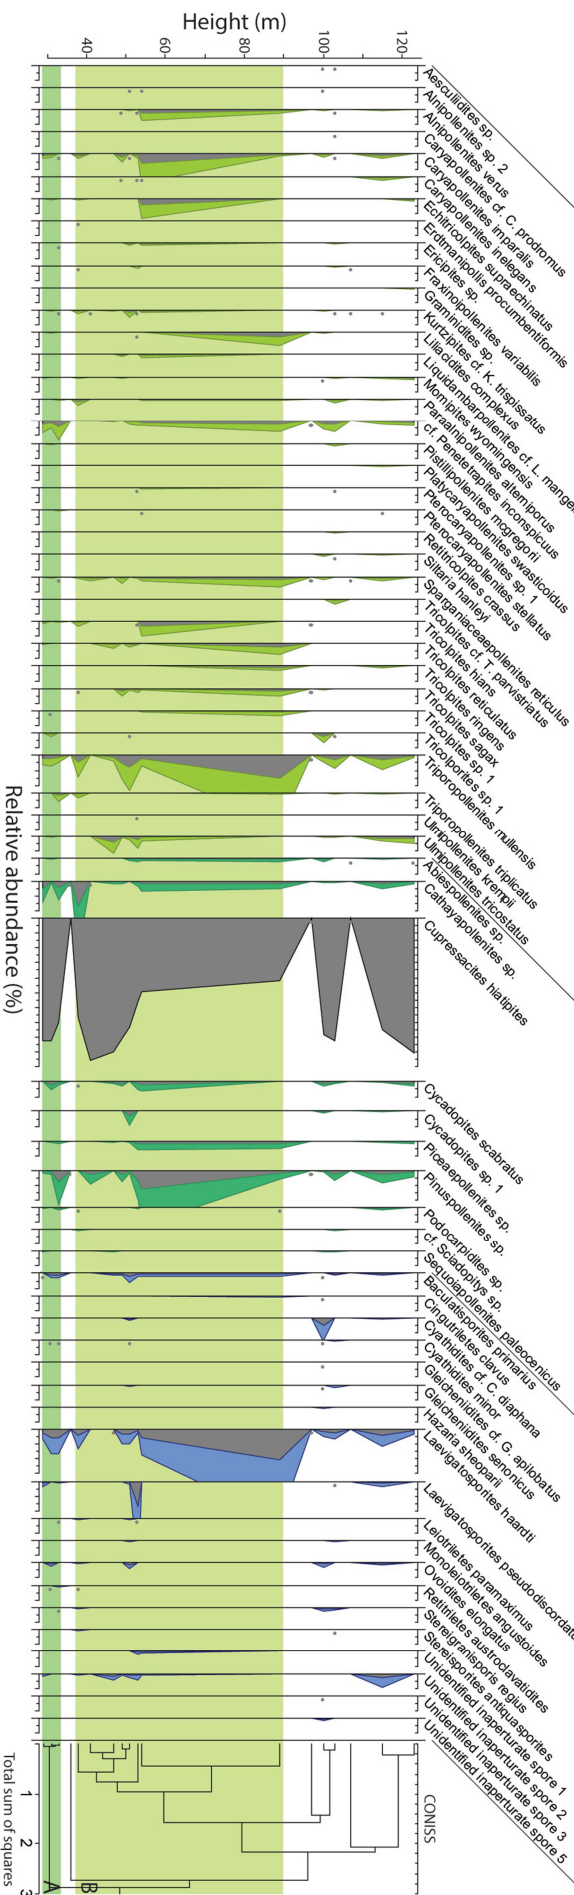

Supplement: Supplementary file 6 [file 1]

## Pteridophytes

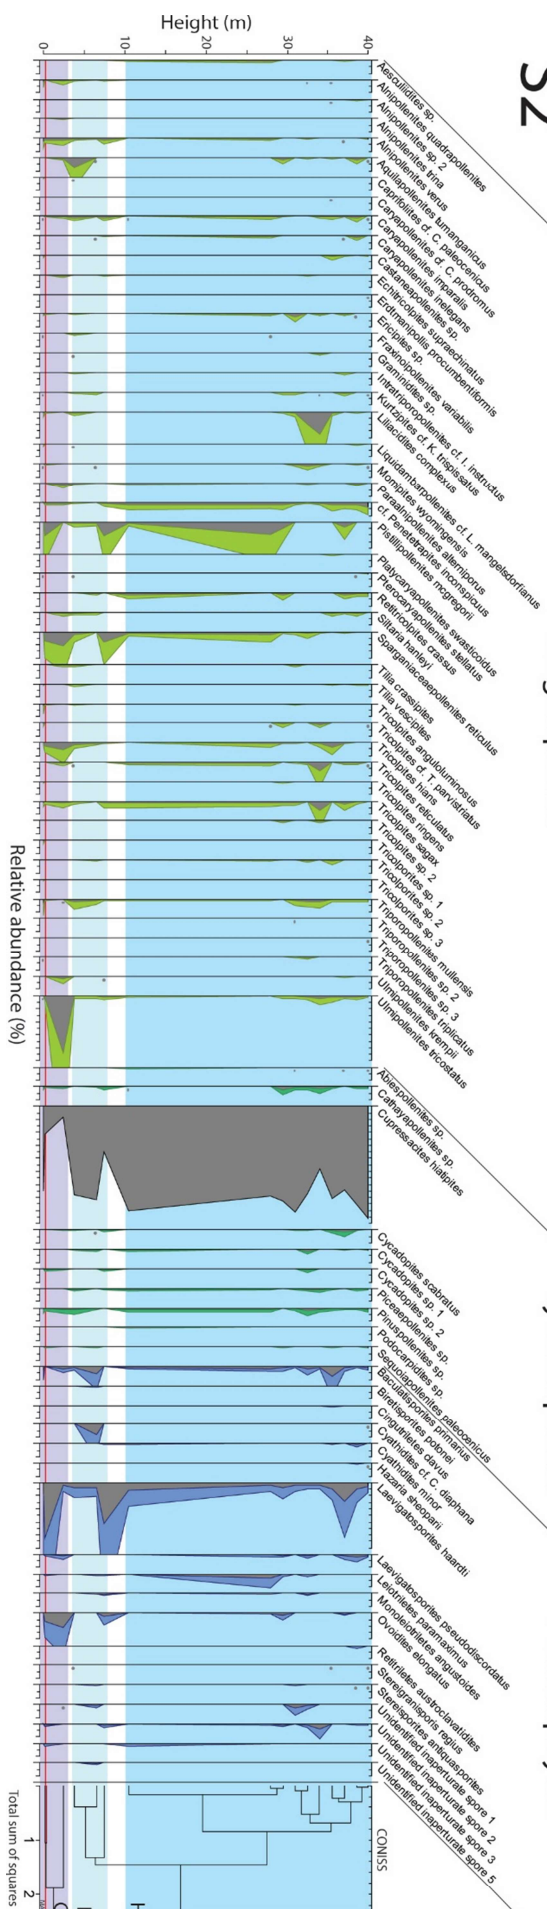

Supplement: Supplementary file 7 [file 1]

## Pteridophytes

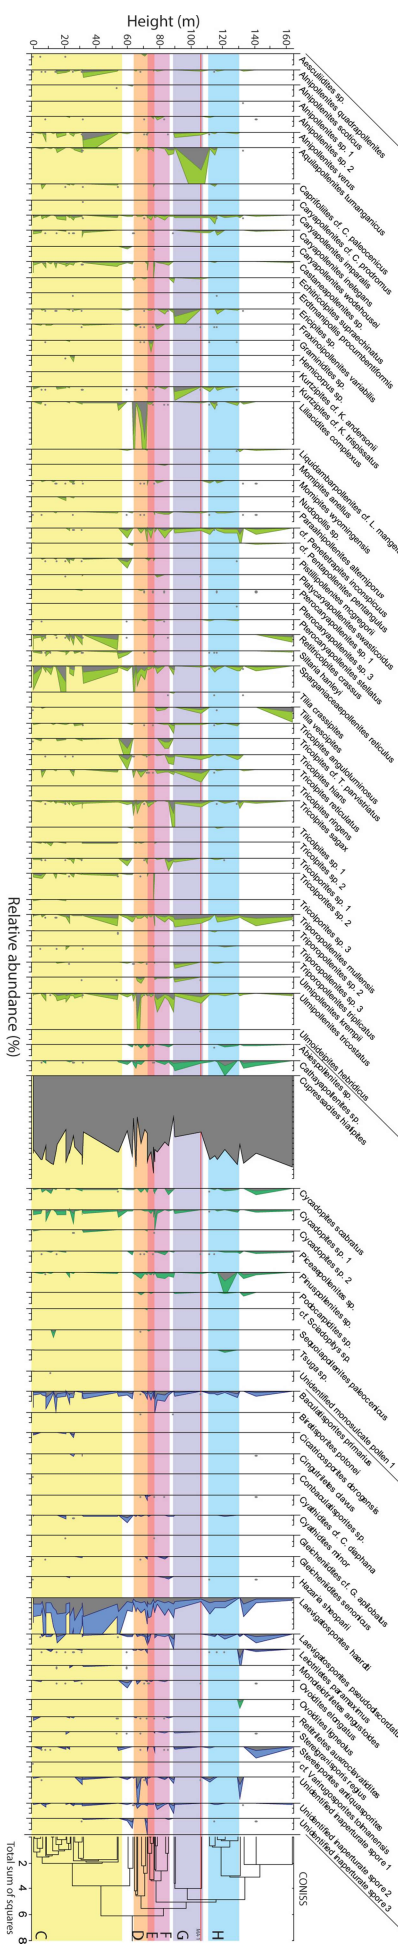

Supplement: Supplementary file 8 [file 1]
